# Supplementary material for: Practical and validated tool to assess falls risk in the primary care setting: a systematic review
Source: HighWire-hosted journal article supplement (doi:10.1136/bmjopen-2020-045431), 2021-09-01
Supplement: bmjopen-2020-045431supp001_data_supplement.pdf [file bmjopen-2020-045431supp001_data_supplement.pdf]

## Additional file 1

### Recent queries in pubmed

Search,Query,Items found,Time

|                                                                                                                                                                                                                                                                                                                                                                                                                                                                                                               |                                                |                                      |
|---------------------------------------------------------------------------------------------------------------------------------------------------------------------------------------------------------------------------------------------------------------------------------------------------------------------------------------------------------------------------------------------------------------------------------------------------------------------------------------------------------------|------------------------------------------------|--------------------------------------|
| #1,"Search (((("Aged"[Mesh]) OR "Frail Elderly"[Mesh] OR Aged* OR Frail Elderly* OR Elderly*)) AND ("Accidental Falls"[Mesh] OR Accidental Falls* OR Falls*)) AND (((Risk Assessment"[Mesh]) OR "Diagnosis"[Mesh]) OR "Prognosis"[Mesh] OR Risk Assessment* OR Diagnos* OR Prognos* OR Screen* OR Predict*)) AND (((Sensitivity and Specificity"[Mesh]) OR "Reproducibility of Results"[Mesh]) OR "Data Accuracy"[Mesh] OR Sensitivity* OR Specificity* OR Accuracy* OR Reliab* OR Valid*) Filters: Full text | Publication date from 2000/01/01 to 2020/07/01 | Field: Title/Abstract",1956,03:40:44 |
|---------------------------------------------------------------------------------------------------------------------------------------------------------------------------------------------------------------------------------------------------------------------------------------------------------------------------------------------------------------------------------------------------------------------------------------------------------------------------------------------------------------|------------------------------------------------|--------------------------------------|
